# Supplementary material for: Tannic acid stabilized silver nanoparticles for inkjet printing of conductive flexible electronics
Source: Royal Society of Chemistry journal article supplement (doi:10.1039/c6ra19800g), 2016-01-01
Supplement: c6ra19800g1.pdf [file c6ra19800g1.pdf]

## Tannic acid stabilized silver nanoparticles for inkjet printing conductive flexible electronics

Nan Zhang, Jing Luo\*, Ren Liu, Xiaoya Liu

*The Key Laboratory of Food Colloids and Biotechnology, Ministry of Education,  
School of Chemical and Material Engineering, Jiangnan University, Lihu Street 1800,  
Wuxi 214122, Jiangsu, China*

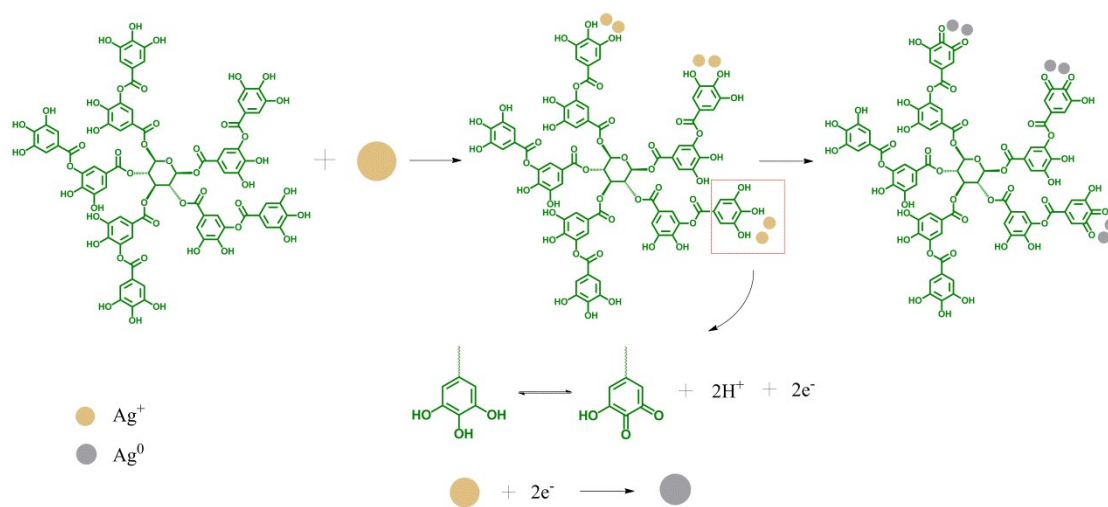

**Fig. S1** The cartoon mechanism of reduction of silver ions with tannic acid

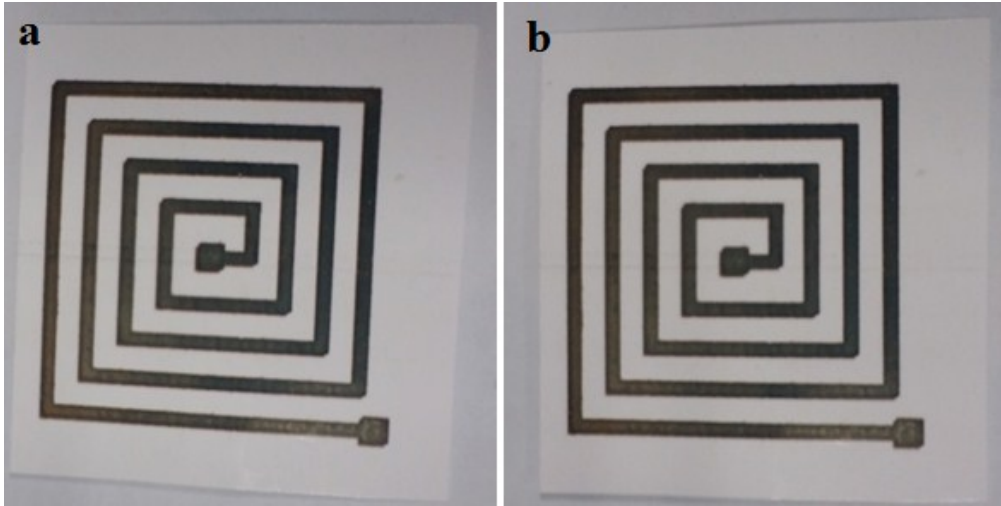

**Fig. S2** Digital images of printed silver patterns before (a) and after (b) tape test, and the tape removed from silver patterns (c).
